# Supplementary material for: Nanostructured modified electrodes: Role of ions and solvent flux in redox active polyelectrolyte multilayer films
Source: Royal Society of Chemistry journal article supplement (doi:10.1039/b609341h), 2006-01-01
Supplement: b609341h.pdf [file b609341h.pdf]

## Nanostructured Modified Electrodes: Role of ions and solvent in redox active polyelectrolyte multilayer films

Mario Tagliazucchi, Doris Grumelli and Ernesto J. Calvo

### Supplementary Information

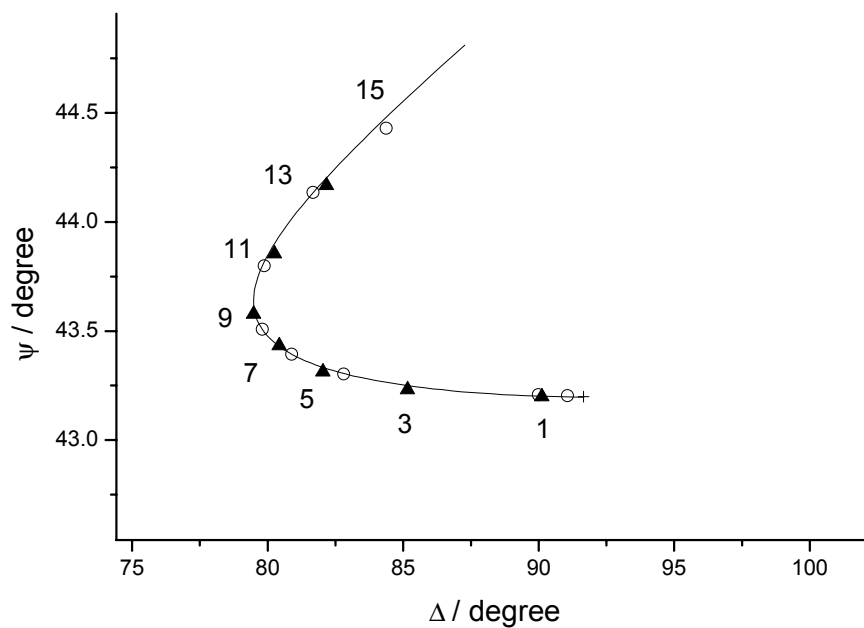

Figure 1S: Ellipsometric angles,  $\Psi$  vs  $\Delta$ , plot for the assembly of PAH-Os (open circles) and PSS (solid triangles) and best fit (solid line).

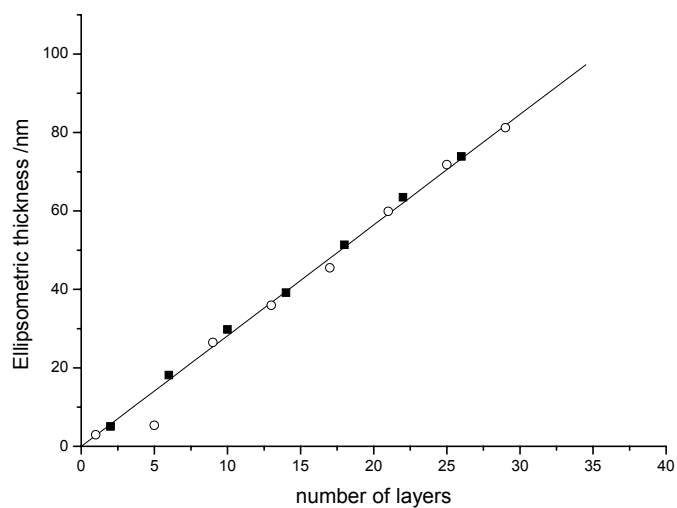

Figure 2S: Ellipsometric thickness for the assembly of PAH-Os (open circles) and PSS (solid triangles) vs number of adsorbed layers.
